# Supplementary material for: The Long-Lasting Effects of “Placebo Injections” in Knee Osteoarthritis: A Meta-Analysis
Source: PubMed Central journal article supplement — Cartilage. 2020 Mar 18;13(1 Suppl):185S–196S. doi: 10.1177/1947603520906597 (PMC8808779; doi:10.1177/1947603520906597), 2020-03-18

**sTable 1 Characteristics of the patients in the included studies**

| Study           | Patients screened | Patients included    | Knees included    | Patients at F-U   | Knees at F-U      | Male/female                                       | Age mean $\pm$ SD, (range)                                 | BMI mean $\pm$ SD, (range)                          | Duration of OA mean $\pm$ SD (range) | Knee OA grade                                                                             |
|-----------------|-------------------|----------------------|-------------------|-------------------|-------------------|---------------------------------------------------|------------------------------------------------------------|-----------------------------------------------------|--------------------------------------|-------------------------------------------------------------------------------------------|
| Altman, 2009    | 821               | 295                  | 295               | 259               | 259               | 109/186 <sup>a</sup>                              | 60.8 $\pm$ 10.0 (NR)                                       | 33.0 $\pm$ 7.0 (NR)                                 | NR                                   | K-L2 115, K-L3 180 <sup>a</sup>                                                           |
| Altman, 2004    | 454               | 174                  | 174               | 119               | 119               | 63/111 <sup>a</sup>                               | 63.3 $\pm$ NR (35-85)                                      | 29.5 $\pm$ NR (18.4-54.6)                           | 6.5 $\pm$ NR (0.0-50.5)              | K-L2 39, K-L3 90, K-L4 45 <sup>a</sup>                                                    |
| Arden, 2014     | NR                | 110                  | 110               | 91 (ITT 110)      | 91 (ITT 110)      | 59/51 <sup>a</sup>                                | 60.9 $\pm$ NR (30-86)                                      | 27.5 $\pm$ NR (20.1-41)                             | 3.1 $\pm$ NR (0-44.1)                | K-L2 40, K-L3 70 <sup>a</sup>                                                             |
| Auw-Yang, 2008  | 250               | 78                   | 78                | 74                | 74                | 43/31 <sup>b</sup>                                | 53 $\pm$ 11 (NR)                                           | 28 $\pm$ 14 (NR)                                    | NR                                   | NR                                                                                        |
| Baltzer, 2009   | 464               | 107                  | 107               | 99                | 99                | 39/68 <sup>a</sup>                                | 60.3 $\pm$ 10.7 (NR)                                       | NR                                                  | NR                                   | NR                                                                                        |
| Bar-Or, 2013    | 391               | 4ml 83<br>10ml 81    | 4ml 83<br>10ml 81 | 4ml 83<br>10ml 79 | 4ml 83<br>10ml 79 | 4ml 26/57 <sup>a</sup><br>10ml 31/50 <sup>a</sup> | 4ml 60.7 $\pm$ 8.3 (41-84)<br>10ml 63.8 $\pm$ 10.0 (41-84) | 4ml 34.5 $\pm$ 8.0 (NR)<br>10ml 32.1 $\pm$ 6.5 (NR) | NR                                   | 4ml K-L2 29, K-L3 32, K-L4 22 <sup>a</sup><br>10ml K-L2 26, K-L3 34, K-L4 21 <sup>a</sup> |
| Brandt, 2001    | 226               | 112                  | 112               | 69                | 69                | 26/43 <sup>b</sup>                                | 67 $\pm$ 8.4 (NR)                                          | 29.8 $\pm$ 6.5 (NR)                                 | NR                                   | NR                                                                                        |
| Chao, 2016      | 80                | 39                   | 39                | 33                | 33                | 31/2 <sup>b</sup>                                 | 63.2 $\pm$ 12.4 (NR)                                       | NR                                                  | 12.5 $\pm$ NR (NR)                   | NR                                                                                        |
| Chevalier, 2010 | 329               | 129 (130 as treated) | 129               | 117               | 117               | 41/88 <sup>a</sup>                                | 62.5 $\pm$ 9.2 (NR)                                        | 29.8 $\pm$ 5.7 (NR)                                 | 5.8 $\pm$ 5.4 (NR)                   | K-L2 51<br>K-L3 78<br>K-L4 1 <sup>a</sup>                                                 |
| Conaghan, 2017  | 310               | 100                  | 100               | 85                | 85                | 39/61 <sup>a</sup>                                | 59.7 $\pm$ 8.23 (NR)                                       | 31.2 $\pm$ 5.1 (NR)                                 | 6.4 $\pm$ 5.8 (NR)                   | NR                                                                                        |

| Study           | Patients screened | Patients included | Knees included | Patients at F-U | Knees at F-U | Male/female                                     | Age mean $\pm$ SD, (range) | BMI mean $\pm$ SD, (range) | Duration of OA mean $\pm$ SD (range)       | Knee OA grade                                              |
|-----------------|-------------------|-------------------|----------------|-----------------|--------------|-------------------------------------------------|----------------------------|----------------------------|--------------------------------------------|------------------------------------------------------------|
| Conaghan, 2018  | 1181              | 163               | 163            | 149             | 149          | 66/96 <sup>a</sup> (1 patients was not treated) | 62.4 $\pm$ 8.9 (40-85)     | 30.2 $\pm$ 4.7 (NR)        | 6.6 $\pm$ 5.79 (NR)                        | K-L2 69, K-L3 93 <sup>a</sup> (1 patients was not treated) |
| Day, 2019       | 240               | 124               | 124            | 115             | 115          | 51 <sup>a</sup>                                 | 62 $\pm$ NR (33-75)        | NR                         | <1 y 12<br>1-2y 13<br>2-5y 36<br>>5y 63    | NR                                                         |
| Eker, 2017      | 109               | 27                | 27             | 26              | 26           | 14 <sup>b</sup>                                 | 69.7 $\pm$ 7.3 (NR)        | 30.7 $\pm$ 6.3 (NR)        | 4.8 $\pm$ 1.6 (NR)                         | K-L2 8, K-L3 9, K-L 9 <sup>a</sup>                         |
| Gormeli, 2017   | 250               | 45                | 45             | 40              | 40           | 20 <sup>b</sup>                                 | 52.8 $\pm$ 12.8 (NR)       | 29.5 $\pm$ 3.2 (NR)        | NR                                         | KL0,1,2,3 27<br>KL4 13 <sup>b</sup>                        |
| Grecomoro, 1987 | 34                | NR                | 18             | NR              | 16           | NR                                              | NR $\pm$ NR (43-92)        | NR                         | NR                                         | NR                                                         |
| Hangody, 2018   | 368               | 69                | 69             | 66              | 66           | 18 <sup>a</sup>                                 | 58.0 $\pm$ 9.0 (NR)        | 29.1 $\pm$ 5 (NR)          | NR                                         | K-L1 17, K-L2 38, K-L3 14, K-L4 0 <sup>a</sup>             |
| Henrotin, 2017  | 84                | 41                | 41             | 31              | 31           | 10 <sup>a</sup>                                 | 63 $\pm$ 8.9 (NR)          | 30.8 $\pm$ 7.2 (NR)        | 5.9 $\pm$ 5.3 (NR)                         | K-L2 24<br>K-L3 17 <sup>a</sup>                            |
| Huang, 2011     | 227               | 100               | 100            | 100             | 100          | 22 <sup>a</sup>                                 | 64.2 $\pm$ 8.4 (NR)        | 25.4 $\pm$ 2.9 (NR)        | 1.0 $\pm$ 2.2 (NR)                         | K-L2 60, K-L3 40 <sup>a</sup>                              |
| Huskisson, 1999 | 100               | 50                | 50             | 41              | 41           | 21 <sup>a</sup>                                 | 64.8 $\pm$ 9.3 (NR)        | NR                         | 0-6m 7<br>7-12m 15<br>13-24m 13<br>>25m 15 | K-L2 28<br>K-L3 22 <sup>a</sup>                            |
| Jorgensen, 2010 | 415               | 170               | 170            | 159             | 159          | 73/97 <sup>a</sup>                              | 61.4 $\pm$ 11.1 (NR)       | NR                         | 6.7 $\pm$ 8.2 (NR)                         | NR                                                         |

| Study            | Patients screened | Patients included | Knees included | Patients at F-U | Knees at F-U | Male/female         | Age mean $\pm$ SD, (range) | BMI mean $\pm$ SD, (range) | Duration of OA mean $\pm$ SD (range) | Knee OA grade                                         |
|------------------|-------------------|-------------------|----------------|-----------------|--------------|---------------------|----------------------------|----------------------------|--------------------------------------|-------------------------------------------------------|
| Jubb, 2003       | 534               | 200               | 200            | 159             | 159          | 72/128 <sup>a</sup> | 65.0 $\pm$ 9.1 (NR)        | 29.8 $\pm$ 5.0 (NR)        | 8.5 $\pm$ 7.5 (NR)                   | NR                                                    |
| Karlsson, 2002   | 246               | 57                | 57             | 48              | 48           | 22/35 <sup>a</sup>  | 71.0 $\pm$ 6.0 (NR)        | NR                         | NR                                   | Ahlbaeck1 33<br>Ahlbaeck2 24 <sup>a</sup>             |
| Kim, 2018        | 269               | 83                | 83             | 81              | 81           | 11/70 <sup>b</sup>  | 61.5 $\pm$ 7.3 (NR)        | 25.7 $\pm$ 2.6 (NR)        | 5.0 $\pm$ 4.2 (NR)                   | NR                                                    |
| Kon, 2018        | 59                | 15                | 15             | 14              | 14           | 9/6 <sup>a</sup>    | 54 $\pm$ NR (44-67)        | NR                         | NR                                   | K-L2 10<br>K-L3 4 <sup>b</sup>                        |
| Kotevoglou, 2006 | 78                | NR                | NR             | 18              | 18           | 2/16 <sup>b</sup>   | 60.1 $\pm$ 5.4 (50-72)     | NR                         | 3.7 $\pm$ 4.0 (NR)                   | NR                                                    |
| Kul-Panza, 2010  | 48                | 23                | 23             | 22              | 22           | 5/18 <sup>a</sup>   | 62.8 $\pm$ 7.8 (NR)        | 29.9 $\pm$ 6 (NR)          | 6.3 $\pm$ 6.5 (NR)                   | K-L1 6<br>K-L2 11<br>K-L3 4<br>K-L4 2 <sup>a</sup>    |
| Lee, 2015        | 87                | 27                | 27             | 25              | 25           | NR                  | 58 $\pm$ NR (49-69)        | 25 $\pm$ NR (21.3-29.6)    | NR                                   | NR                                                    |
| Lee, 2019        | 33                | 12                | 12             | 12              | 12           | 3/9 <sup>b</sup>    | 63.2 $\pm$ 4.2 (NR)        | 25.4 $\pm$ 3.0 (NR)        | NR                                   | K-L2 5<br>K-L3 6<br>K-L4 1 <sup>a</sup>               |
| Lin, 2019        | 194               | NR                | 27             | NR              | 26           | 10/17 <sup>a</sup>  | 62.2 $\pm$ 11.7 (NR)       | 25.0 $\pm$ 3.1 (NR)        | NR                                   | Ahlback1 4<br>Ahlback2 12<br>Ahlback3 11 <sup>a</sup> |
| Lohmander, 1996  | 240               | 120               | 120            | 93              | 93           | 53/67 <sup>a</sup>  | 58.0 $\pm$ 8.4 (NR)        | NR                         | NR                                   | Ahlback1 109<br>Ahlback2 11 <sup>a</sup>              |
| Lozada, 2017     | 530               | 113               | 113            | 85              | 85           | 46/67 <sup>b</sup>  | 59.7 $\pm$ 8.7 (NR)        | 29.6 $\pm$ 4.2 (NR)        | NR                                   | K-L2 66<br>K-L3 47 <sup>a</sup>                       |

| Study                 | Patients screened | Patients included | Knees included    | Patients at F-U   | Knees at F-U      | Male/female                                                       | Age mean $\pm$ SD, (range)                          | BMI mean $\pm$ SD, (range)                          | Duration of OA mean $\pm$ SD (range) | Knee OA grade                                                                                                          |
|-----------------------|-------------------|-------------------|-------------------|-------------------|-------------------|-------------------------------------------------------------------|-----------------------------------------------------|-----------------------------------------------------|--------------------------------------|------------------------------------------------------------------------------------------------------------------------|
| Lundsgaard, 2008      | 308               | 2ml 84<br>20ml 83 | 2ml 84<br>20ml 83 | 2ml 80<br>20ml 81 | 2ml 80<br>20ml 81 | 2ml 40/44 <sup>a</sup><br>20ml 37/36 <sup>a</sup>                 | 2ml 69.6 $\pm$ 7.3 (NR)<br>20ml 69.8 $\pm$ 6.8 (NR) | 2ml 29.3 $\pm$ 4.3 (NR)<br>20ml 29.2 $\pm$ 4.9 (NR) | NR                                   | 2ml K-L1 9<br>K-L2 10<br>K-L3 30<br>K-L4 31 <sup>b</sup><br>20ml K-L1 11<br>K-L2 11<br>K-L3 34<br>K-L4 27 <sup>a</sup> |
| McAlindon, 2017       | 445               | 70                | 70                | 60                | 60                | 32/38 <sup>a</sup>                                                | 57.2 $\pm$ 7.6 (NR)                                 | 31.7 $\pm$ 6.6 (NR)                                 | NR                                   | K-L2 29<br>K-L3 41 <sup>a</sup>                                                                                        |
| McAlindon, 2018       | 538               | 89                | 89                | 82                | 82                | 38/51 <sup>a</sup>                                                | 61.1 $\pm$ 7.8 (NR)                                 | 30.4 $\pm$ 5.1 (NR)                                 | 7.6 $\pm$ 5.7 (NR)                   | K-L2 50<br>K-L3 39 <sup>a</sup>                                                                                        |
| Navarro-Sarabia, 2011 | 446               | 152               | 152               | 94                | 94                | 128/25 <sup>a</sup><br>(incoherence between flowchart and tables) | 63.9 $\pm$ 8.9 (NR)                                 | 28.7 $\pm$ 2.6 (NR)                                 | 8.1 $\pm$ 8.4 (NR)                   | K-L2 114<br>K-L3 39 25 <sup>a</sup><br>(incoherence between flowchart and tables)                                      |
| Patel, 2013           | 150               | 26                | 52                | 23                | 46                | 6/17 <sup>b</sup>                                                 | 53.7 $\pm$ 8.2 (37-70)                              | 26.2 $\pm$ 2.9 (21.6-32.2)                          | NR                                   | Ahlback1 25<br>Ahlback2 18<br>Ahlback3 3 <sup>b</sup>                                                                  |
| Pavelka, 1995         | 89                | NR                | NR                | 35                | 35                | 10 <sup>b</sup>                                                   | 62.7 $\pm$ 5.9 (NR)                                 | NR                                                  | <1y 2<br>1-2y 6<br>2-5y 10<br>>5y 18 | NR                                                                                                                     |
| Petterson, 2019       | 783               | 185               | 185               | 184               | 184               | 79 <sup>a</sup>                                                   | 58.7 $\pm$ 9.2 (NR)                                 | 30.4 $\pm$ 4.6 (NR)                                 | NR                                   | K-L2 97<br>K-L3 88 <sup>a</sup>                                                                                        |
| Ravaud, 1999          | 128               | 28                | 28                | 22                | 22                | 10 <sup>a</sup>                                                   | 63 $\pm$ 11 (NR)                                    | 29 $\pm$ 5 (NR)                                     | NR                                   | K-L2 7<br>K-L3 11<br>K-L4 10 <sup>a</sup>                                                                              |
| Raynauld, 2003        | 68                | 34                | 34                | 33                | 33                | 13 <sup>a</sup>                                                   | 63.3 $\pm$ 9.0 (NR)                                 | NR                                                  | 8.7 $\pm$ 6.8 (NR)                   | K-L2 22<br>K-L3 12 <sup>a</sup>                                                                                        |

| Study                | Patients screened | Patients included | Knees included | Patients at F-U | Knees at F-U | Male/female     | Age mean $\pm$ SD, (range) | BMI mean $\pm$ SD, (range) | Duration of OA mean $\pm$ SD (range) | Knee OA grade                                                       |
|----------------------|-------------------|-------------------|----------------|-----------------|--------------|-----------------|----------------------------|----------------------------|--------------------------------------|---------------------------------------------------------------------|
| Rossini, 2015        | 80                | 40                | 40             | 39              | 39           | 5 <sup>a</sup>  | 66.2 $\pm$ 5.5 (NR)        | 29.1 $\pm$ 4.3 (NR)        | NR                                   | NR                                                                  |
| Salottolo, 2018      | 263               | 24                | 24             | 24              | 24           | 12 <sup>a</sup> | 63.1 $\pm$ 8.6 (NR)        | 34.4 $\pm$ 7.9 (NR)        | NR                                   | NR                                                                  |
| Scale, 1994          | NR                | 40                | 40             | 40              | 40           | 20 <sup>a</sup> | 58.6 $\pm$ 12.9 (NR)       | NR                         | 5.9 $\pm$ 6.5 (NR)                   | K-L2 16<br>K-L3 18<br>K-L4 6 <sup>a</sup>                           |
| Schwappach, 2017     | 55                | 20                | 20             | 19              | 19           | 7 <sup>a</sup>  | 61.4 $\pm$ 9.4 (NR)        | 28.7 $\pm$ 3.8 (NR)        | NR                                   | K-L2 0<br>K-L3 12<br>K-L4 8 <sup>a</sup>                            |
| Shrestha, 2018       | 171               | NR                | NR             | 60              | 60           | 23 <sup>b</sup> | 67.1 $\pm$ 5.2 (NR)        | NR                         | NR                                   | NR                                                                  |
| Smith, 2016          | 114               | 15                | 15             | 15              | 15           | 6 <sup>a</sup>  | 46.6 $\pm$ 9.4 (NR)        | 27.5 $\pm$ 4.8 (NR)        | NR                                   | K-L2 10<br>K-L3 5 <sup>a</sup>                                      |
| Soltani, 2019        | 20                | 10                | 10             | 10              | 10           | 1 <sup>a</sup>  | 55.8 $\pm$ NR (NR)         | 28.9 $\pm$ NR (NR)         | NR                                   | NR                                                                  |
| Strand, 2012         | 598               | 128               | 128            | 119             | 119          | 51 <sup>a</sup> | 60.3 $\pm$ 10.0 (NR)       | 28.7 $\pm$ 3.8 (NR)        | 2.6 $\pm$ 3.4 (NR)                   | K-L1 18,<br>K-L2 47,<br>K-L3 63 <sup>a</sup>                        |
| Van Der Weegen, 2015 | 269               | 97                | 97             | 96              | 96           | 50 <sup>a</sup> | 60.1 $\pm$ 10.1 (NR)       | 29.3 $\pm$ 4.7 (NR)        | 5.6 $\pm$ 7.5 (NR)                   | K-L1 27<br>K-L2 49<br>K-L3 18 <sup>a</sup>                          |
| Wobig, 1998          | 110               | 54                | 60             | 54              | 60           | 14 <sup>a</sup> | 59 $\pm$ 3 (NR)            | NR                         | 6 $\pm$ 0.6 (NR)                     | Lersens1 4<br>Lersens2 22<br>Lersens3 28<br>lersens4 6 <sup>a</sup> |

F-U: follow-up; SD: standard deviation; BMI: body mass index; OA: osteoarthritis; NR: non reported; <sup>a</sup>: referred to included patients; <sup>b</sup>: referred to follow-up patients

**sTable 2 Complications reported in the included studies**

| <b>Complication</b> | <b>Overall frequency</b> |
|---------------------|--------------------------|
| Pain                | 6.3% (185/2960)          |
| Local irritation    | 3.5% (104/2960)          |
| Swelling            | 1.0% (29/2960)           |
| Effusion            | 0.9% (18/2960)           |
| Stiffness           | 0.2% (7/2960)            |
| Bleeding            | 0.2% (6/2960)            |
| Non specified       | 2.7% (94/3518)           |

2960 is the overall number of patients in the studies providing detailed information on complications (34/50), 3518 is the overall number of patients in the studies reporting on complications (41/50).

# sFigure 1 Forest plot of the VAS score at the different follow-ups

## VAS 1-month follow-up

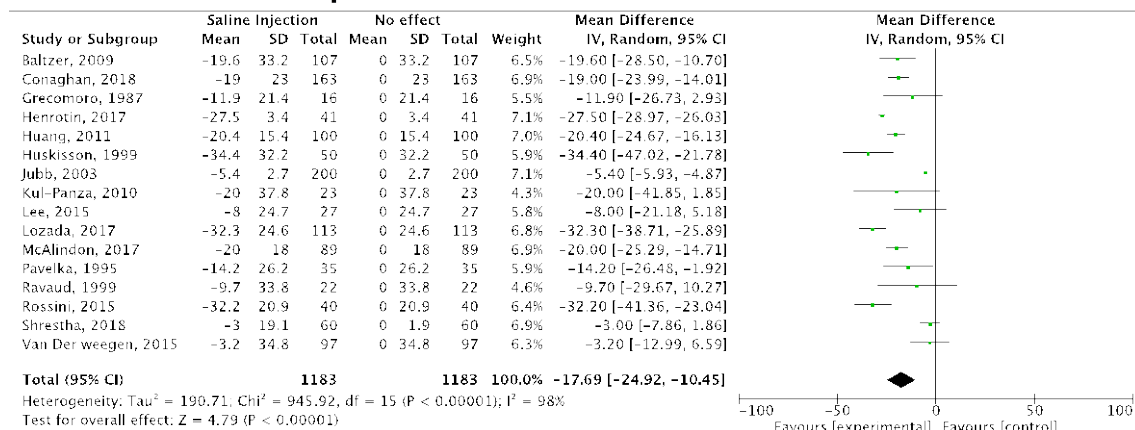

## VAS 3-month follow-up

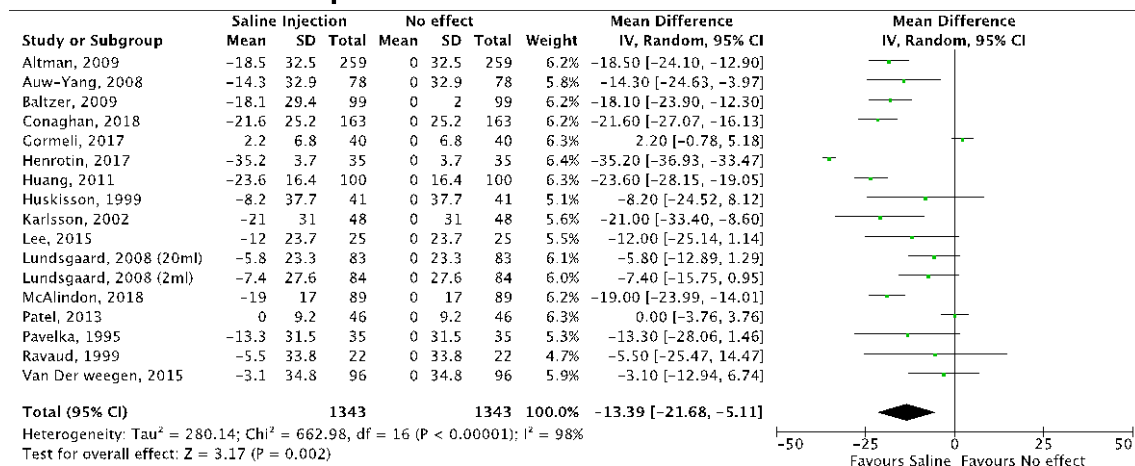

## VAS 6-month follow-up

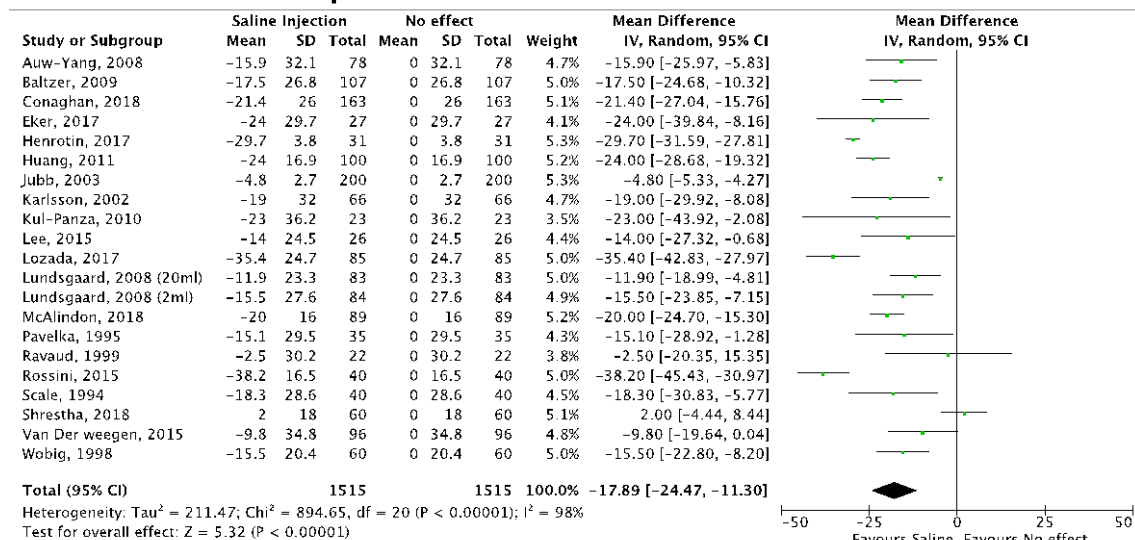

sFigure 2 Forest plot of the WOMAC-Pain score at the different follow-ups

### WOMAC-Pain 1-month follow-up

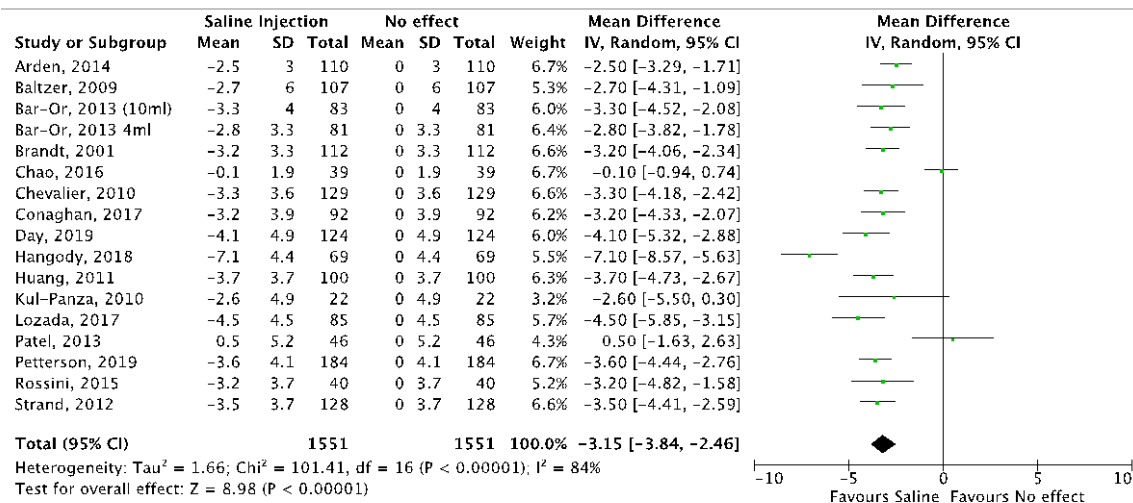

### WOMAC-Pain 3-month follow-up

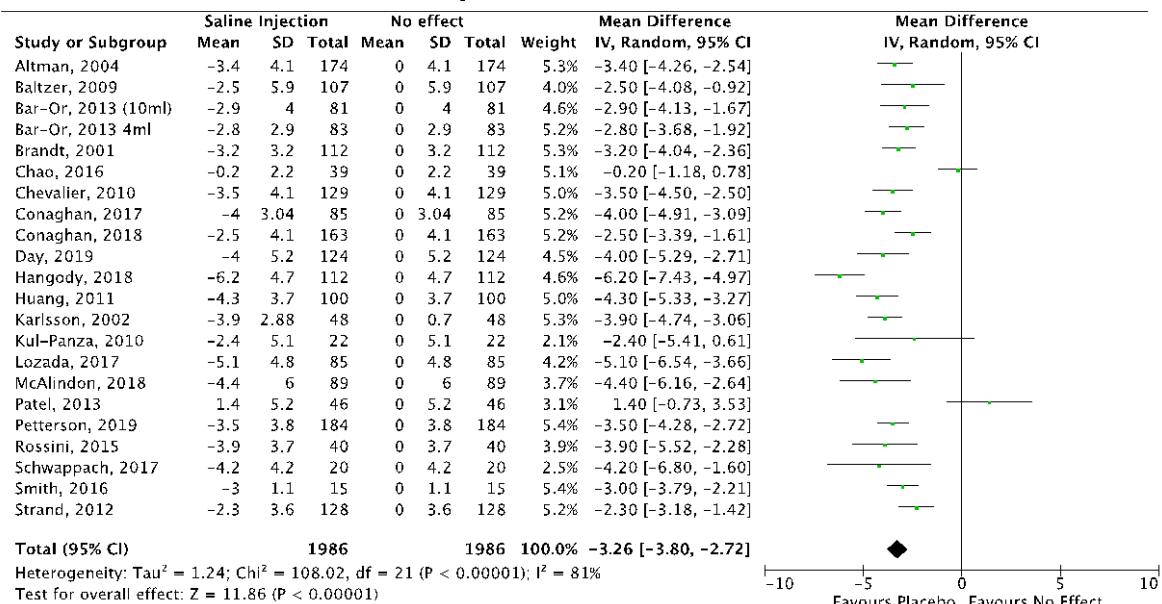

### WOMAC-Pain 6-month follow-up

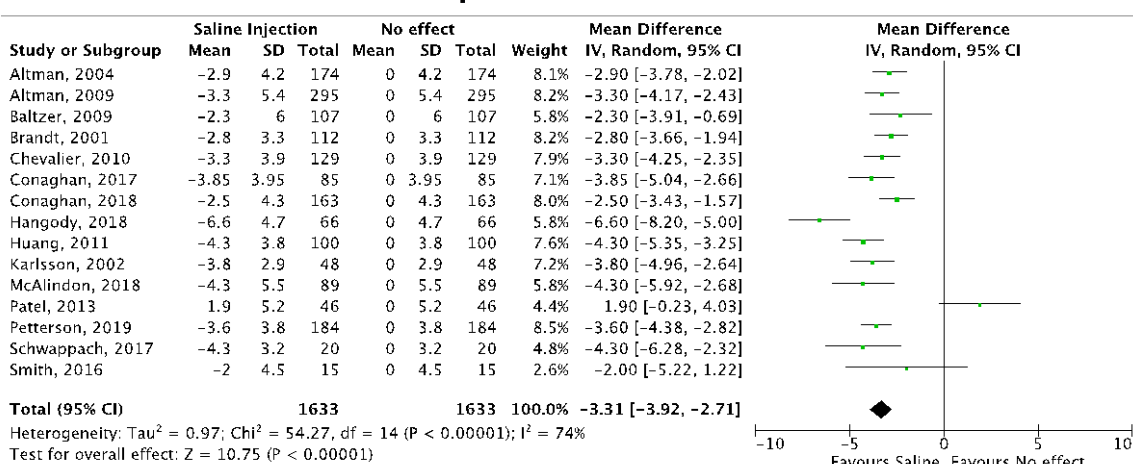



sFigure 3 Forest plot of the WOMAC-Stiffness score at the different follow-ups

### WOMAC-Stiffness 1-month follow-up

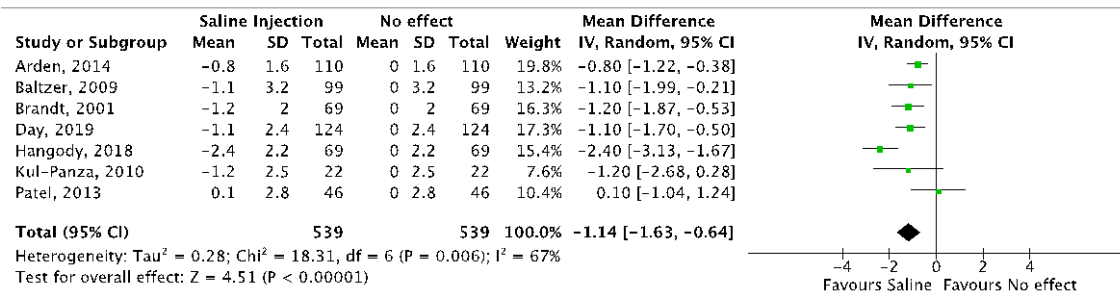

### WOMAC-Stiffness 3-month follow-up

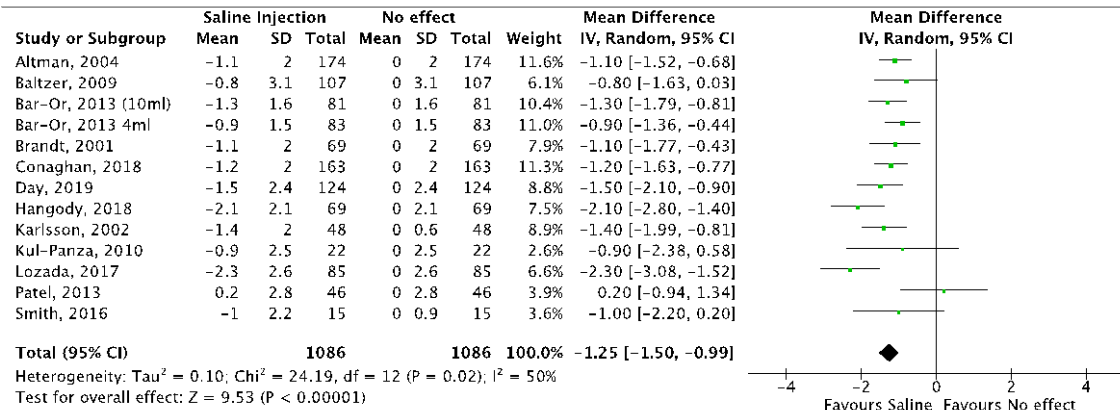

### WOMAC-Stiffness 6-month follow-up

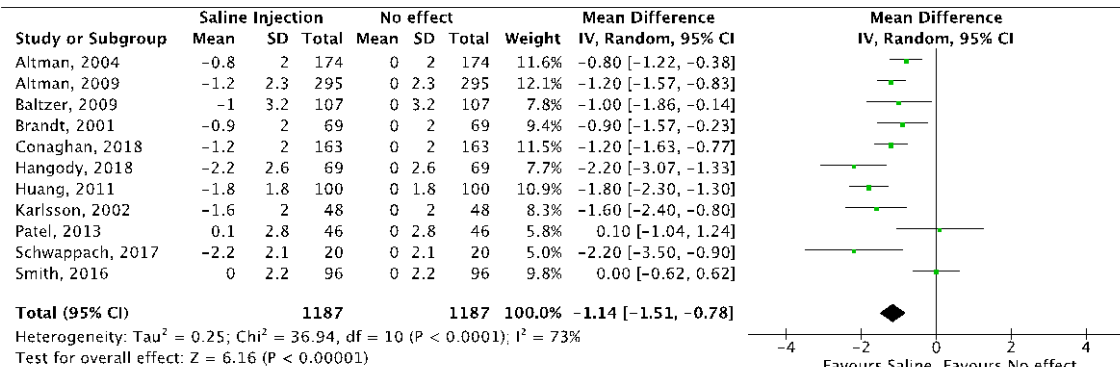

sFigure 4 Forest plot of the WOMAC-Function score at the different follow-ups

### WOMAC-Function 1-month follow-up

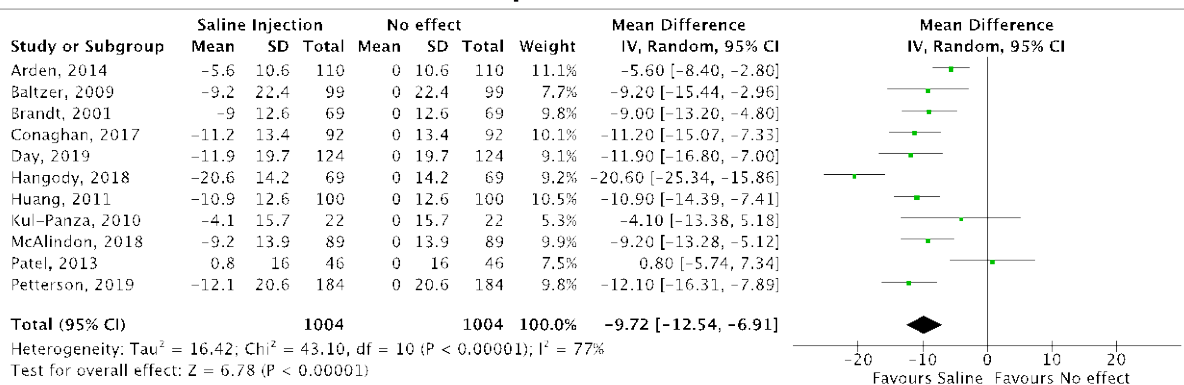

### WOMAC-Function 3-month follow-up

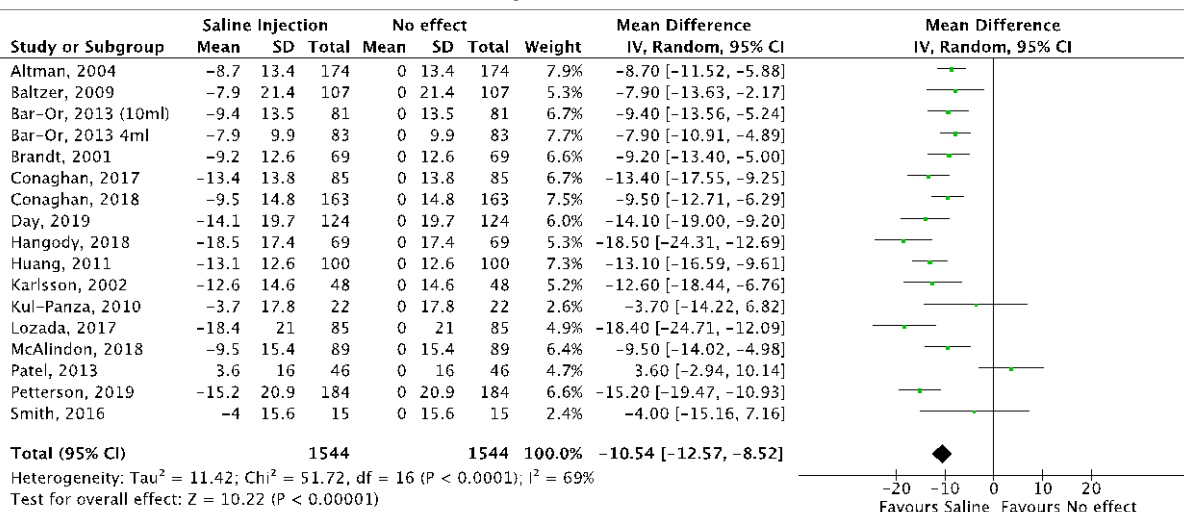

### WOMAC-Function 6-month follow-up

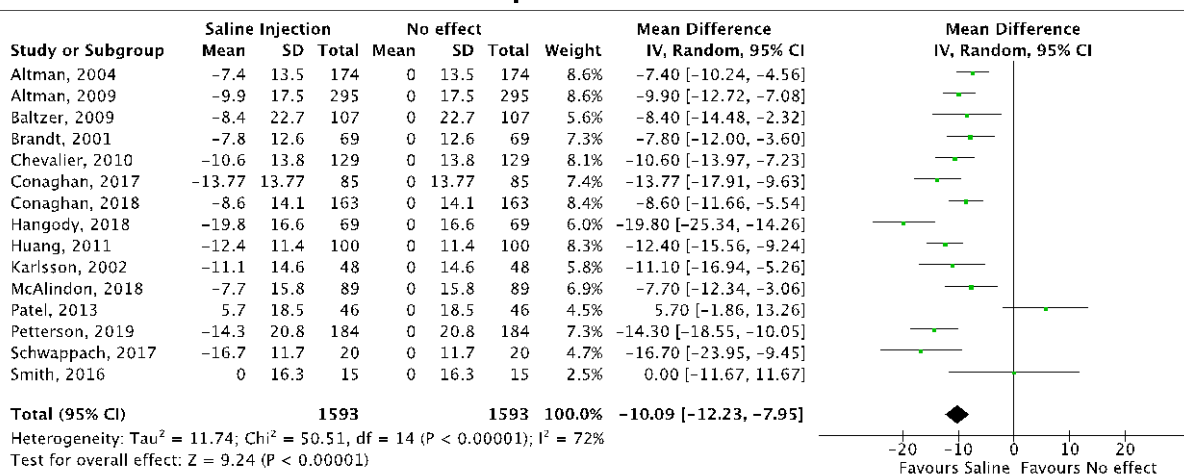

sFigure 5 Forest plot of the evaluator global assessment at the different follow-ups

### Evaluator global assessment 3-month follow-up

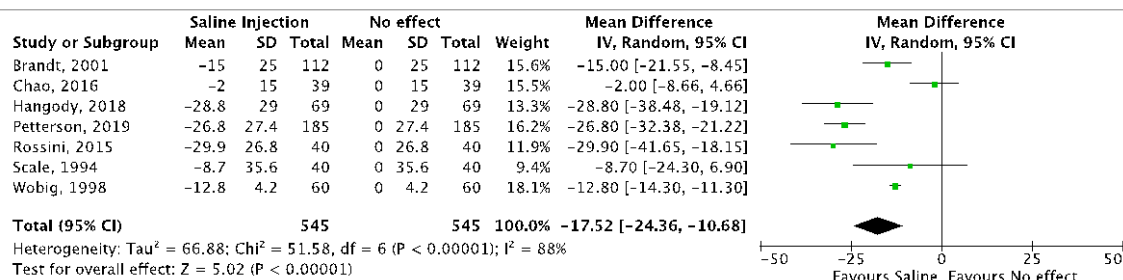

### Evaluator global assessment 6-month follow-up

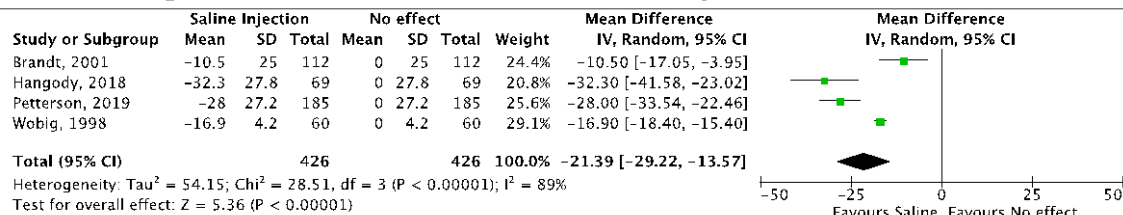

Supplement: Supplements_Update.pdf [file Supplements_Update.pdf]
